# Supplementary material
Source: Springer Nature journal article supplement (https://www.springermedizin.de/resource/supplementary/12968_2010_1428_MOESM2_ESM.pdf/9580110)

# Signal from Saturation-Recovery Prepared FLASH

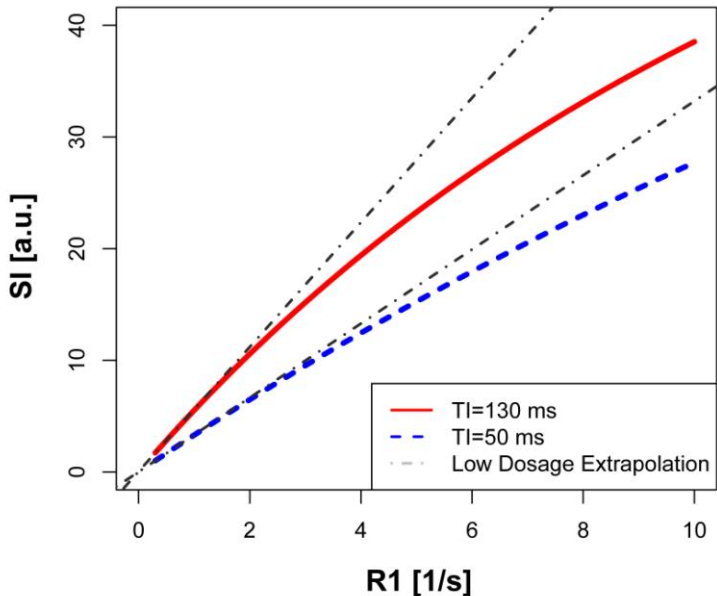

Supplement: MOESM2 [file 9580110]
